# Supplementary material
Source: PubMed Central journal article supplement (PMC8043359)
Supplement: ryai200137suppa1.pdf [file ryai200137suppa1.pdf]

**Table E1. Patient Demographics**

| PET study # | Corresponding Figure # | Purpose   | History                                                                                   | Regional PET findings (O: presence, X: absence) |           |       |                |                         |
|-------------|------------------------|-----------|-------------------------------------------------------------------------------------------|-------------------------------------------------|-----------|-------|----------------|-------------------------|
|             |                        |           |                                                                                           | Metastatic                                      | Head/Neck | Chest | Abdomen/Pelvis | Musculo-skeletal Region |
| 1           | 3a                     | Restaging | Urothelial cancer; post right nephrectomy                                                 | O                                               | O         | O     | O              | O                       |
| 2           | 3b                     | Restaging | Advanced small cell lung cancer                                                           | X                                               | O         | X     | X              | X                       |
| 3           | 3c                     | Restaging | Widespread metastatic disease                                                             | X                                               | X         | X     | O              | X                       |
| 4           | 3d                     | Restaging | Metastatic breast cancer; post lumpectomy and irradiation                                 | X                                               | O         | X     | O              | O                       |
| 5           | E3a                    | Staging   | Squamous cell carcinoma                                                                   | O                                               | O         | X     | X              | O                       |
| 6           | E3b                    | Restaging | Metastatic colon cancer; chemotherapy                                                     | X                                               | O         | O     | X              | O                       |
| 7           | E3c                    | Restaging | Hodgkin lymphoma                                                                          | O                                               | O         | X     | O              | O                       |
| 8           | E3d                    | Restaging | Hodgkin lymphoma                                                                          | O                                               | X         | X     | X              | O                       |
| 9           | E3e                    | Restaging | Parotid gland adenocarcinoma; perjeta/perceptin therapy                                   | O                                               | O         | O     | X              | O                       |
| 10          | E3f                    | Restaging | Nasopharyngeal squamous cell carcinoma; chemoradiation therapy                            | O                                               | X         | O     | O              | O                       |
| 11          | 4a (1)                 | Restaging | Metastatic urothelial carcinoma                                                           | X                                               | O         | X     | X              | O                       |
| 12          | 4a (2)                 | Restaging | Metastatic bladder cancer; pembrolizumab therapy                                          | X                                               | O         | X     | X              | O                       |
| 13          | 4b (1)                 | Restaging | Metastatic breast cancer                                                                  | X                                               | O         | X     | X              | O                       |
| 14          | 4b (2)                 | Restaging | Metastatic breast cancer                                                                  | X                                               | O         | X     | X              | O                       |
| 15          | 4c                     | Staging   | None                                                                                      | O                                               | O         | O     | O              | O                       |
| 16          | 4d                     | Restaging | Li Fraumeni syndrome and osteosarcoma                                                     | O                                               | O         | X     | O              | O                       |
| 17          | 5a                     | Restaging | Right lower lobe squamous cell carcinoma; chemoradiation                                  | O                                               | O         | O     | O              | O                       |
| 18          | 6a                     | Restaging | Stage IIIB cervical adenocarcinoma; radiation and chemotherapy                            | O                                               | O         | X     | X              | O                       |
| 19          | 6b                     | Restaging | Metastatic breast cancer                                                                  | X                                               | O         | X     | X              | X                       |
| 20          | 6c                     | Restaging | Sarcoidosis                                                                               | O                                               | O         | X     | X              | O                       |
| 21          | 6d                     | Restaging | Metastatic breast cancer                                                                  | X                                               | O         | X     | O              | X                       |
| 22          |                        | Restaging | Right breast cancer; partial mastectomy; sigmoid colon cancer; resection and chemotherapy | O                                               | X         | X     | X              | O                       |
| 23          |                        | Restaging | Bone marrow metastases                                                                    | X                                               | O         | X     | X              | X                       |
| 24          |                        | Restaging | Chronic lymphocytic leukemia                                                              | O                                               | O         | O     | O              | O                       |
| 25          |                        | Restaging | Large B-cell lymphoma                                                                     | O                                               | X         | X     | O              | O                       |
| 26          |                        | Restaging | Metastatic colon cancer; palliative chemotherapy                                          | X                                               | X         | O     | X              | O                       |
| 27          |                        | Restaging | Metastatic duodenal adenocarcinoma; chemotherapy                                          | X                                               | X         | X     | X              | O                       |

|    |  |                  |                                                                                                                                                     |   |   |   |   |   |
|----|--|------------------|-----------------------------------------------------------------------------------------------------------------------------------------------------|---|---|---|---|---|
| 28 |  | Characterization | Intussusception and lymphadenopathy                                                                                                                 | O | O | O | X | O |
| 29 |  | Restaging        | Pulmonary nodule                                                                                                                                    | O | O | O | X | O |
| 30 |  | Staging          | Pleomorphic undifferentiated sarcoma; chronic lymphocytic leukemia                                                                                  | O | O | X | X | X |
| 31 |  | Restaging        | Melanoma                                                                                                                                            | O | O | X | O | O |
| 32 |  | Restaging        | Breast cancer                                                                                                                                       | O | O | X | O | O |
| 33 |  | Restaging        | Multiple myeloma                                                                                                                                    | O | O | O | X | X |
| 34 |  | Characterization | Pulmonary nodule                                                                                                                                    | O | O | O | O | O |
| 35 |  | Restaging        | Dedifferentiated ameloblastic carcinoma; right inferior maxillectomy; adjuvant radiation therapy                                                    | O | X | O | O | O |
| 36 |  | Restaging        | Metastatic breast cancer; left-sided partial mastectomy                                                                                             | X | X | O | X | X |
| 37 |  | Restaging        | Metastatic melanoma; left upper lobectomy                                                                                                           | X | X | O | X | O |
| 38 |  | Restaging        | Metastatic breast cancer                                                                                                                            | X | X | X | X | X |
| 39 |  | Restaging        | Breast cancer and thyroid cancer; right axillary dissection; thyroid cancer; hemithyroidectomy                                                      | O | X | X | O | O |
| 40 |  | Restaging        | Diffuse large B cell lymphoma; chemotherapy                                                                                                         | O | O | O | O | O |
| 41 |  | Restaging        | Metastatic melanoma                                                                                                                                 | X | O | O | O | O |
| 42 |  | Restaging        | Melanoma                                                                                                                                            | O | O | O | X | X |
| 43 |  | Restaging        | Metastatic breast cancer; bladder and osseous metastases                                                                                            | X | O | O | O | X |
| 44 |  | Restaging        | Hurthle cell thyroid cancer; thyroidectomy and radiation treatment                                                                                  | O | O | O | O | O |
| 45 |  | Characterization | Mass in the right obturator externus muscle on prostate                                                                                             | O | O | O | X | X |
| 46 |  | Staging          | Gallstone pancreatitis; endoscopic retrograde cholangiopancreatography and cholecystectomy; colonic variant intestinal adenocarcinoma (gallbladder) | O | O | O | X | O |
| 47 |  | Characterization | Stage III C ovarian carcinoma                                                                                                                       | O | O | O | X | O |
| 48 |  | Restaging        | Squamous cell carcinoma (cervix); radiation and chemotherapy                                                                                        | O | O | O | O | O |
| 49 |  | Restaging        | Squamous cell carcinoma; thoracotomy                                                                                                                | O | X | X | X | X |
| 50 |  | Restaging        | Urothelial carcinoma; right laparoscopic nephroureterectomy                                                                                         | O | O | O | O | O |
| 51 |  | Characterization | Pulmonary ground glass nodule                                                                                                                       | O | O | O | O | O |
| 52 |  | Restaging        | Uterine serous cancer; currently undergoing chemotherapy; hysterectomy and bilateral salpingo-oophorectomy                                          | O | O | O | X | O |
| 53 |  | Restaging        | Hodgkin lymphoma; chemotherapy                                                                                                                      | O | X | O | O | O |
| 54 |  | Restaging        | Laryngeal cancer; laryngectomy and cervical lymph node dissection                                                                                   | O | X | X | X | O |
| 55 |  | Restaging        | Fallopian tube cancer; splenectomy; olaparib therapy                                                                                                | O | O | O | X | O |
| 56 |  | Staging          | Soft palate carcinoma                                                                                                                               | O | X | O | O | O |
| 57 |  | Restaging        | Metastatic breast cancer                                                                                                                            | X | O | X | O | X |
| 58 |  | Restaging        | Squamous cell carcinoma (tonsil); chemoradiation; neck dissection                                                                                   | O | X | O | O | O |
| 59 |  | Restaging        | Intra-abdominal desmoplastic small round cell tumor                                                                                                 | O | O | X | X | O |
| 60 |  | Restaging        | Lung cancer; lobectomy                                                                                                                              | O | X | X | O | X |

|    |  |                  |                                                                                    |   |   |   |   |   |
|----|--|------------------|------------------------------------------------------------------------------------|---|---|---|---|---|
| 61 |  | Staging          | Endometrioid adenocarcinoma                                                        | O | O | X | X | X |
| 62 |  | Restaging        | Medullary thyroid cancer; neck dissection                                          | O | O | X | X | X |
| 63 |  | Restaging        | Squamous carcinoma (nasopharynx)                                                   | O | O | X | O | O |
| 64 |  | Restaging        | Cholangiocarcinoma; pembrolizumab therapy                                          | O | O | X | X | X |
| 65 |  | Restaging        | Anaplastic large cell lymphoma; chemotherapy                                       | O | O | O | X | O |
| 66 |  | Restaging        | Metastatic breast cancer; mastectomy; axillary lymph node dissection               | X | O | X | X | O |
| 67 |  | Restaging        | Metastatic chondrosarcoma                                                          | X | O | X | X | X |
| 68 |  | Restaging        | Metastatic melanoma                                                                | X | O | O | X | O |
| 69 |  | Restaging        | Metastatic lung cancer; chemoradiation                                             | X | O | X | X | O |
| 70 |  | Staging          | High-grade B cell lymphoma                                                         | O | X | X | X | X |
| 71 |  | Restaging        | Endometrial cancer                                                                 | O | O | X | X | O |
| 72 |  | Restaging        | Stage IV lung adenocarcinoma; bilateral salpingo-oophorectomy                      | O | O | X | O | O |
| 73 |  | Restaging        | Ovarian cancer                                                                     | O | O | X | X | O |
| 74 |  | Restaging        | Mantle cell lymphoma                                                               | O | O | O | O | O |
| 75 |  | Restaging        | Metastatic lung adenocarcinoma; erlotinib therapy                                  | X | O | O | X | O |
| 76 |  | Restaging        | Cervical cancer; chemoradiation and brachytherapy                                  | O | O | O | X | O |
| 77 |  | Staging          | Poorly differentiated lung adenocarcinoma                                          | O | X | X | O | O |
| 78 |  | Staging          | Breast cancer                                                                      | O | O | X | O | O |
| 79 |  | Restaging        | Stage IV melanoma                                                                  | O | X | O | X | X |
| 80 |  | Restaging        | Metastatic breast cancer                                                           | X | O | X | X | O |
| 81 |  | Characterization | Right middle lobe pulmonary nodule; cholecystectomy                                | O | O | X | X | O |
| 82 |  | Restaging        | Right renal urothelial carcinoma; nephroureterectomy                               | O | O | O | O | X |
| 83 |  | Restaging        | Stage III B high-grade serous ovarian cancer                                       | O | X | X | X | O |
| 84 |  | Restaging        | Metastatic colorectal cancer                                                       | X | O | X | O | O |
| 85 |  | Restaging        | Metastatic Merkel cell carcinoma                                                   | X | O | X | X | X |
| 86 |  | Restaging        | Metastatic breast cancer; Post lumpectomy and radiation                            | X | X | X | X | X |
| 87 |  | Characterization | TB; Right breast cancer; mastectomy; left upper lobe resection; left thoracoplasty | O | X | O | O | O |
| 88 |  | Restaging        | Metastatic breast cancer; right mastectomy; left mammoplasty                       | X | O | X | X | O |
| 89 |  | Restaging        | Metastatic breast cancer                                                           | X | O | X | O | O |
| 90 |  | Restaging        | Metastatic breast cancer                                                           | X | O | O | O | X |
| 91 |  | Restaging        | Metastatic paraganglioma                                                           | X | O | X | X | X |
| 92 |  | Restaging        | Lung adenocarcinoma                                                                | O | X | X | O | O |
| 93 |  | Restaging        | Metastatic breast cancer                                                           | X | X | X | O | X |
| 94 |  | Restaging        | Metastatic breast cancer                                                           | X | O | X | X | O |
| 95 |  | Restaging        | Tumor; pulmonary mass resection                                                    | O | O | X | X | O |

|                                               |  |                  |                                                                                             |             |             |             |             |             |
|-----------------------------------------------|--|------------------|---------------------------------------------------------------------------------------------|-------------|-------------|-------------|-------------|-------------|
| 96                                            |  | Characterization | Prostate cancer                                                                             | O           | O           | X           | O           | O           |
| 97                                            |  | Restaging        | Metastatic melanoma                                                                         | X           | O           | O           | X           | X           |
| 98                                            |  | Restaging        | Tonsil cancer; left tonsillectomy; neck dissection; reconstruction flap                     | O           | X           | O           | O           | O           |
| 99                                            |  | Restaging        | Esophageal squamous cell carcinoma; esophagectomy; chemoradiation                           | O           | O           | X           | O           | O           |
| 100                                           |  | Restaging        | Breast cancer                                                                               | O           | O           | X           | O           | O           |
| 101                                           |  | Restaging        | Metastatic breast cancer; mastectomies; axillary lymph node dissection                      | X           | O           | X           | O           | X           |
| 102                                           |  | Restaging        | Diffuse large B-cell lymphoma                                                               | O           | O           | O           | X           | O           |
| 103                                           |  | Restaging        | Metastatic breast cancer; mastectomies; axillary lymph node dissection; irradiation therapy | X           | O           | O           | O           | O           |
| 104                                           |  | Restaging        | Metastatic breast cancer; lumpectomy; axillary lymph node dissection; irradiation therapy   | X           | X           | X           | X           | X           |
| 105                                           |  | Characterization | Rectal squamous cell carcinoma (jejunum and left liver); supracervical hysterectomy         | O           | O           | O           | O           | O           |
| 106                                           |  | Restaging        | Left vocal cord squamous cell carcinoma; chemoradiation therapy                             | O           | X           | X           | O           | O           |
| 107                                           |  | Staging          | Right tongue carcinoma                                                                      | O           | X           | O           | O           | O           |
| 108                                           |  | Restaging        | Metastatic breast cancer; radiation therapy                                                 | X           | O           | X           | O           | O           |
| 109                                           |  | Restaging        | Breast cancer; right partial mastectomy; axillary lymph node dissection                     | X           | X           | O           | X           | X           |
| 110                                           |  | Restaging        | Metastatic breast cancer                                                                    | X           | X           | X           | X           | O           |
| <b>Regional PET Findings from 110 Studies</b> |  |                  |                                                                                             | <b>41</b>   | <b>32</b>   | <b>63</b>   | <b>60</b>   | <b>31</b>   |
| <b>Percentage (%)</b>                         |  |                  |                                                                                             | <b>37.3</b> | <b>29.1</b> | <b>57.3</b> | <b>54.5</b> | <b>28.2</b> |
